# Supplementary material
Source: PubMed Central journal article supplement (PMC7364716)
Supplement: ao0c02031_si_001.pdf [file ao0c02031_si_001.pdf]

## **Supporting Information**

# **Probing the interaction between human serum albumin and 9-hydroxyphenanthrene: a spectroscopic and molecular docking study**

Jing Zhang\*, Xuan Gao, Jinyang Huang, Honghui Wang

Key Laboratory of Estuarine Ecological Security and Environmental Health (Fujian  
Province University), Tan Kah Kee College, Xiamen University, Zhangzhou, 363105,  
PR China

### ***\*Corresponding Author:***

Address: Key Laboratory of Estuarine Ecological Security and Environmental Health  
(Fujian Province University), Tan Kah Kee College, Xiamen University, Zhangzhou,  
Fujian Province, 363105, PR China.

Tel.: +86 0596-6289870; Fax: +86 0596-6288214

E-mail address: [jingz421@xujc.com](mailto:jingz421@xujc.com) (J. Zhang).

## Photophysical properties of HSA and 9-OHPhe

The singlet energies of HSA and 9-OHPhe are 101.22 and 85.55 kcal·mol<sup>-1</sup>, respectively.

### 3.2. Fluorescence quenching mechanism of HSA-9-OHPhe system

*Stern–Volmer equation:*

$$F_0/F = 1 + K_{SV}[Q] = 1 + K_q\tau_0[Q] \quad (S1)$$

$F_0$  and  $F$  are the relative fluorescence intensities of HSA in the absence and presence of 9-OHPhe;  $[Q]$  is the concentration of 9-OHPhe,  $\tau_0$  is the average fluorescence lifetime of HSA in the absence of 9-OHPhe ( $6.09 \times 10^{-9}$  s),  $K_{SV}$  is the Stern-Volmer quenching constant and  $K_q$  is the quenching rate constant.

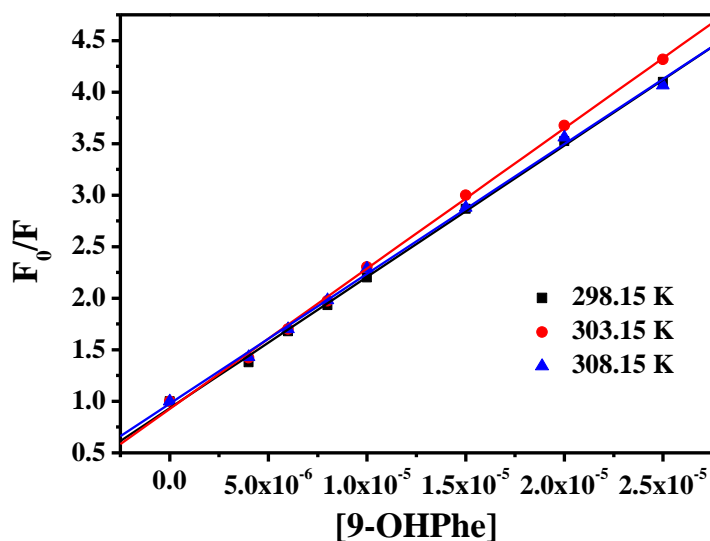

**Figure S1. Stern-Volmer plots for the quenching of HSA by 9-OHPhe at three temperatures**

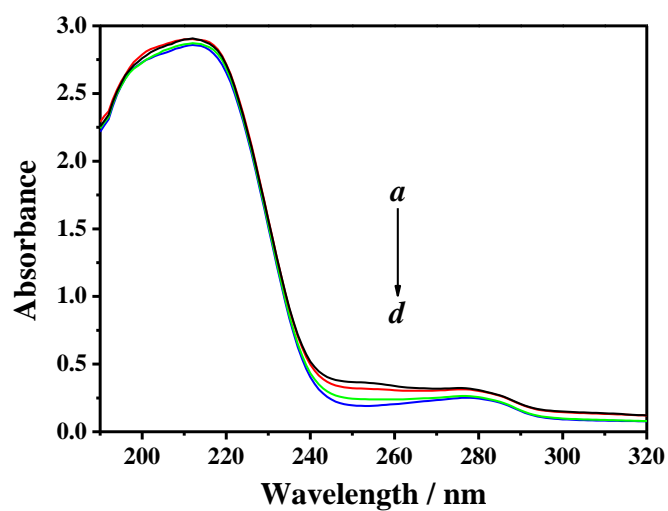

**Figure S2. The UV–visible absorption spectra of HSA in the presence of 9-OHPhe at different concentrations.  $T = 298.15\text{ K}$ ; a ~ d:  $[\text{HSA}] = 5.0 \times 10^{-6}\text{ mol}\cdot\text{L}^{-1}$ ,  $[\text{9-OHPhe}] = (0, 2, 4, 6) \times 10^{-6}\text{ mol}\cdot\text{L}^{-1}$**

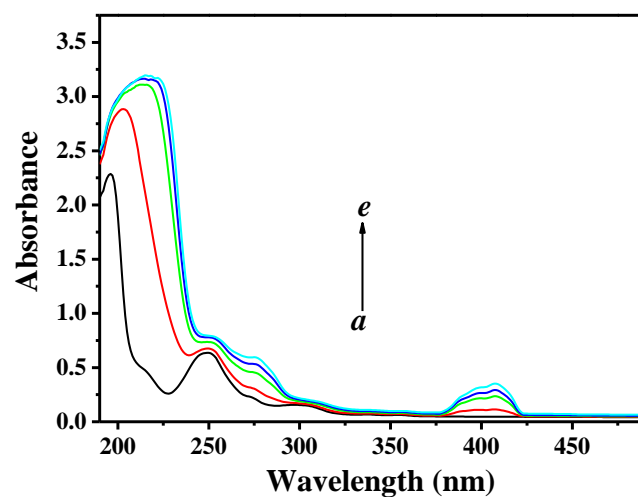

**Figure S3. The UV–visible absorption spectra of 9-OHPhe in the presence of the increasing concentrations of HSA.  $T = 298.15\text{ K}$ ; a ~ e:  $[\text{9-OHPhe}] = 2.0 \times 10^{-5}\text{ mol}\cdot\text{L}^{-1}$ ,  $[\text{HSA}] = (0, 2, 6, 8, 10) \times 10^{-6}\text{ mol}\cdot\text{L}^{-1}$**

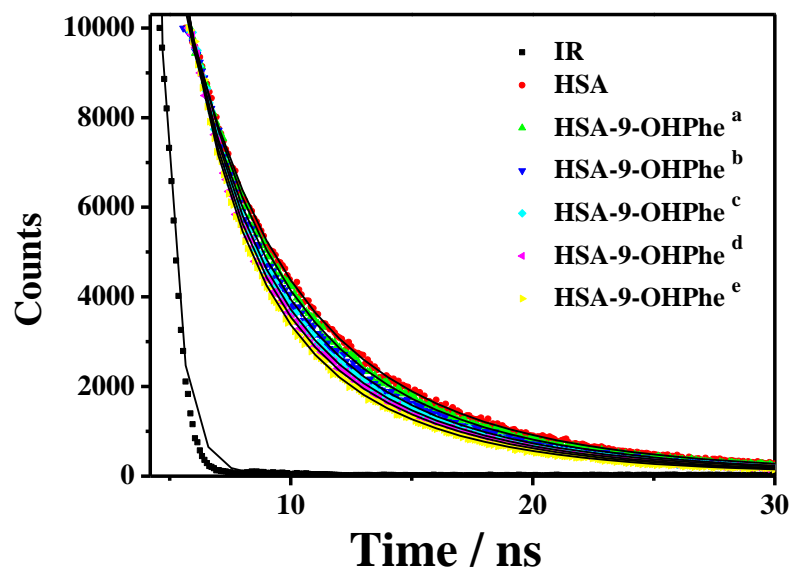

**Figure S4.** The fitting lines for the fluorescence lifetime decay plots of the **HSA-9-OHPhe** system.  $[HSA] = 5.0 \times 10^{-6} \text{ mol} \cdot \text{L}^{-1}$ ;  $[9\text{-OHPhe}]$ , a-e: (5.0, 10.0, 15.0, 20.0, 25.0)  $\times 10^{-6} \text{ mol} \cdot \text{L}^{-1}$

**Table S1** The fluorescence lifetime of HSA in the presence of various concentrations of 9-OHPhe

| System                   | $\tau_{av}$ (ns) | $\chi^2$ |
|--------------------------|------------------|----------|
| HSA                      | 5.39             | 0.9995   |
| HSA-9-OHPhe <sup>a</sup> | 5.00             | 0.9996   |
| HSA-9-OHPhe <sup>b</sup> | 4.98             | 0.9992   |
| HSA-9-OHPhe <sup>c</sup> | 4.57             | 0.9995   |
| HSA-9-OHPhe <sup>d</sup> | 4.40             | 0.9994   |
| HSA-9-OHPhe <sup>e</sup> | 4.22             | 0.9995   |

$[HSA] = 5.0 \times 10^{-6} \text{ mol} \cdot \text{L}^{-1}$ ;  $[9\text{-OHPhe}]$ , a-e: (0, 5.0, 10.0, 15.0, 20.0, 25.0)  $\times 10^{-6} \text{ mol} \cdot \text{L}^{-1}$ ; The reduced  $\chi^2$  value approaching 1 suggests a good fit.

### 3.3. Energy transfer from HSA to 9-OHPhe

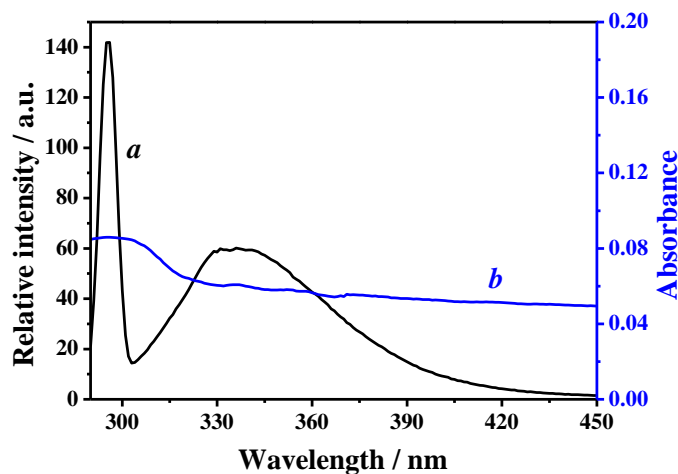

**Figure S5. The overlap of the fluorescence emission spectrum of HSA (a) and the absorption spectrum of 9-OHPhe (b).** [HSA]=[9-OHPhe] =  $5.0 \times 10^{-6}$  mol·L<sup>-1</sup>;  $T = 298.15$  K;  $\lambda_{\text{ex}} = 295.0$  nm, Ex. / Em. Slit =  $5.0 / 5.0$  nm

The efficiency of energy transfer ( $E$ ) between the donor (HSA) and acceptor (9-OHPhe) can be calculated by applying equation (S2):

$$E = 1 - \frac{F}{F_0} = \frac{R_0^6}{R_0^6 + r^6} \quad (\text{S2})$$

In the equation (S2),  $F$  and  $F_0$  are the fluorescence intensity of HSA in the presence and absence of 9-OHPhe.  $r$  is the distance between the donor and acceptor.  $R_0$  is the Förster radius, the critical distance at which the transfer efficiency equals 50%, which is given by the following equation:

$$R_0^6 = 8.79 \times 10^{-25} K^2 n^{-4} \phi J \quad (\text{S3})$$

Where  $K^2$  is the factor describing the relative orientation ( $2/3$ ),  $n$  is the refractive index of medium (1.336),  $\phi$  is the fluorescence quantum yield of HSA (0.15), and the

overlap integral  $J$  expresses the degree of spectral overlap between the donor emission and the acceptor absorption, which is calculated by the following equation:

$$J = \frac{\int_0^{\infty} F(\lambda)\varepsilon(\lambda)\lambda^4 d\lambda}{\int_0^{\infty} F(\lambda)d\lambda} \quad (\text{S4})$$

$F(\lambda)$  is the fluorescence intensity of the donor in the wavelength ranges from  $\lambda$  to  $\lambda+\Delta\lambda$  and  $\varepsilon(\lambda)$  is the molar absorption coefficient of the acceptor at the wavelength  $\lambda$ .

### 3.4. Binding site number ( $n$ ) of HSA with 9-OHPhe

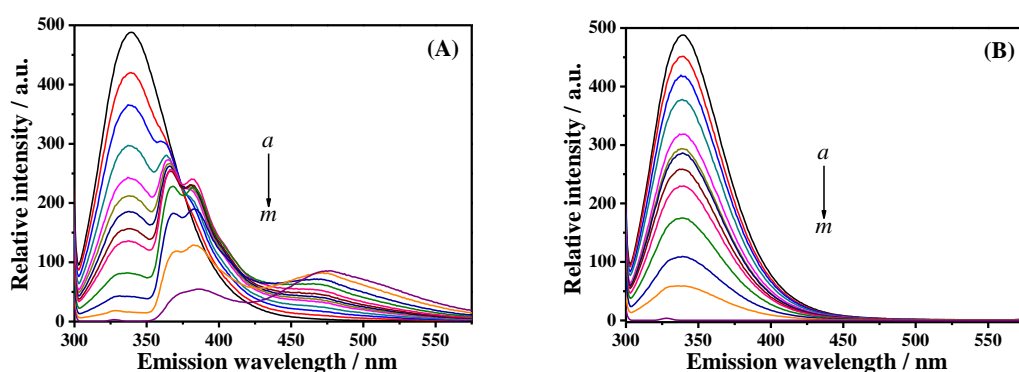

**Figure S6. Fluorescence emission spectra of HSA in the presence (A) and absence (B) of 9-OHPhe.**  $[\text{HSA}] + [\text{9-OHPhe}] = 2.0 \times 10^{-5} \text{ mol} \cdot \text{L}^{-1}$ ;  $T = 298.15 \text{ K}$ ;  $\lambda_{\text{ex}} = 295.0 \text{ nm}$ , Ex. / Em. Slit =  $5.0 / 10.0 \text{ nm}$ ; a ~ m:  $[\text{HSA}] = (20, 18, 16, 14, 12, 11, 10, 9, 8, 6, 4, 2, 0) \times 10^{-6} \text{ mol} \cdot \text{L}^{-1}$

### 3.5. Binding constant ( $K_b$ ) of HSA with 9-OHPhe at different temperatures

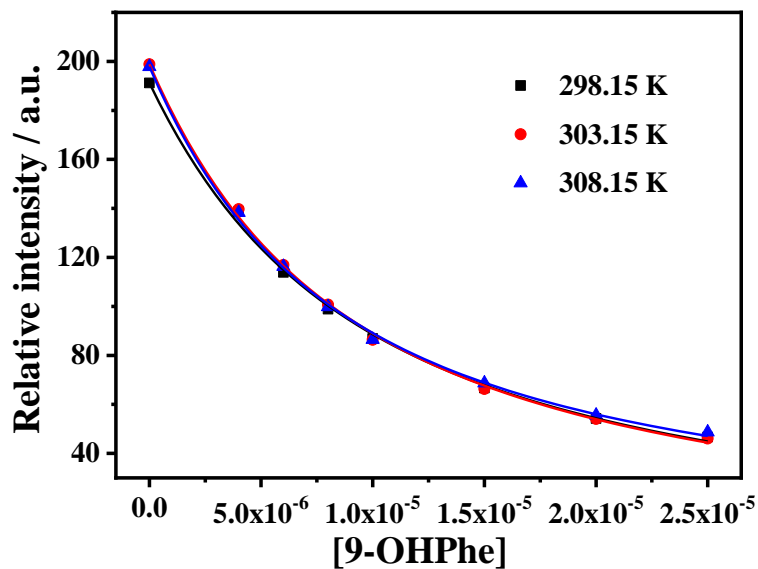

Figure S7. The fitting plots for the fluorescence quenching of HSA by 9-OHPhe at three temperatures

### 3.6. Thermodynamics analysis

*Van't Hoff equations:*

$$\ln K_b = -\frac{\Delta H}{RT} + \frac{\Delta S}{R} \quad (\text{S5})$$

$$\Delta G = \Delta H - T\Delta S \quad (\text{S6})$$

where  $T$  is the experimental temperature (i.e. 298.15, 303.15, 308.15 K),  $R$  is the universal constant of gases ( $8.314 \text{ J mol}^{-1} \cdot \text{K}^{-1}$ ).  $K_b$  is the binding constant at each temperature, obtained in **Section 3.5**.

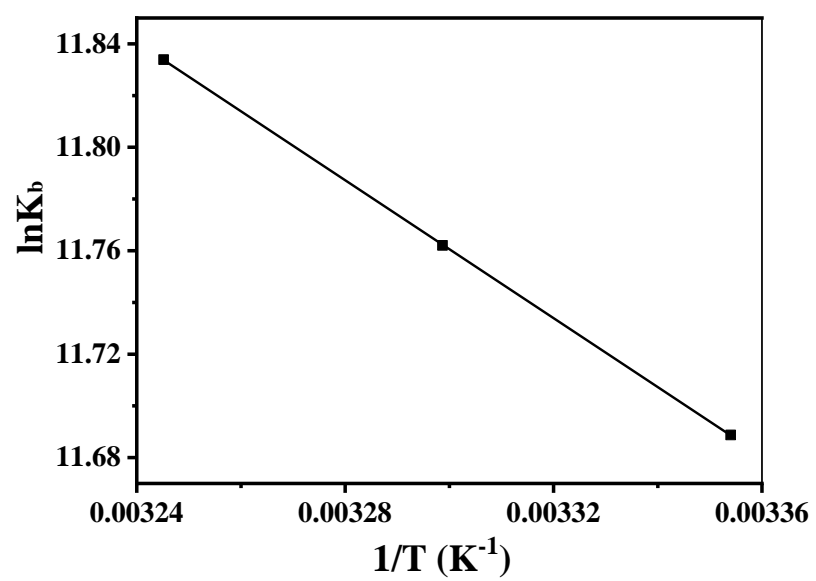

**Figure S8. Fitting line of Van't Hoff equation for 9-OHPhe-HSA system**

### 3.7. Molecular docking

**Table S2 Specific information on the interaction forces between 9-OHPhe and HSA**

|                          | Index | Residue | Distance (Å) | Ligand Atom             | Residue Atom <sup>a</sup>  |
|--------------------------|-------|---------|--------------|-------------------------|----------------------------|
| Hydrophobic Interactions | 1     | LEU134  | 3.15         | C3                      | CD2                        |
|                          | 2     | TYR138  | 3.37         | C3                      | CG                         |
|                          | 3     | LEU139  | 3.17         | C11                     | CD2                        |
|                          | 4     | ILE142  | 3.52         | O15                     | CG2                        |
|                          | 5     | ILE142  | 3.71         | C14                     | CD1                        |
|                          | 6     | LEU154  | 3.44         | C13                     | CD2                        |
|                          | 7     | PHE157  | 3.80         | C13                     | CG                         |
|                          | 8     | ALA158  | 3.41         | C11                     | N                          |
|                          | 9     | TYR161  | 3.26         | O15                     | CZ                         |
|                          | 10    | TYR161  | 3.56         | C9                      | CE1                        |
| Hydrogen Bonds           | Index | Residue | Distance (Å) | Donor Atom <sup>a</sup> | Acceptor Atom <sup>a</sup> |
|                          | 1     | LEU135  | 1.86         | O15 (Ligand)            | O (Residue)                |
|                          | Index | Residue | Distance (Å) | Angle (°)               | Ligand Atoms <sup>a</sup>  |
| $\pi$ -Stacking          | 1     | TYR161  | 4.19         | 19.75                   | C6, C7, C2, C3, C4, C5     |

<sup>a</sup> The first one character of the atom name consists of the chemical symbol for the atom type. All the atom names beginning with “C” are carbon atoms; “N” indicates a nitrogen and “O” indicates oxygen. The next character is the remoteness indicator code, which is transliterated according to: “D” stands for (~) “δ”; “E” ~ “ε”; “G” ~ “γ”; “Z” ~ “ζ”.
